# Supplementary material
Source: PubMed Central journal article supplement (PMC4272443)

# Supplementary figure 1

**A**

**Caspase-9**

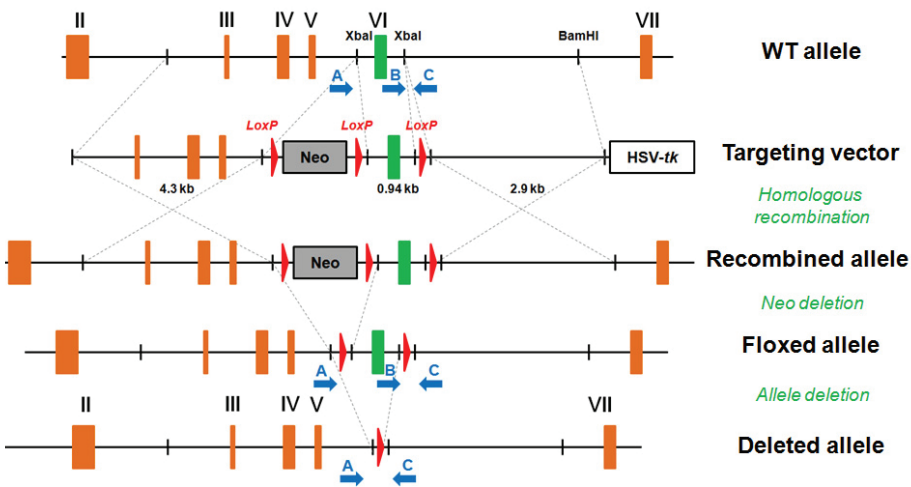

**Caspase-3**

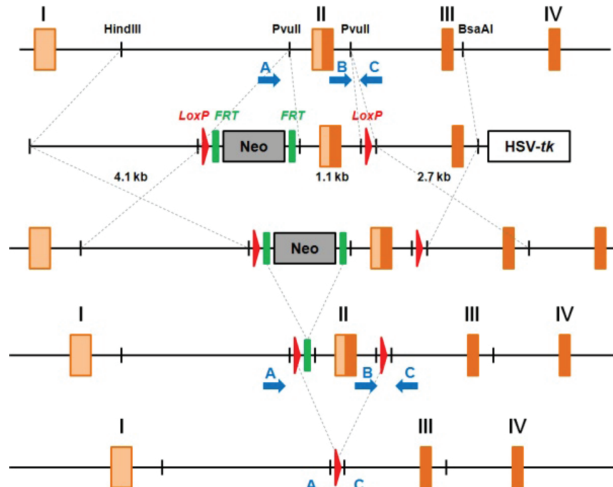

**B**

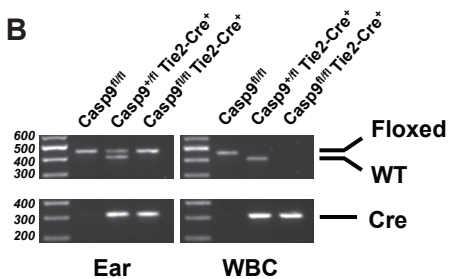

**C**

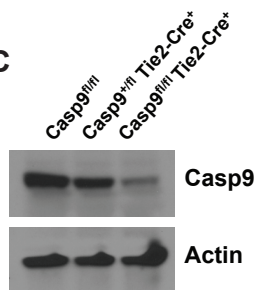

**D**

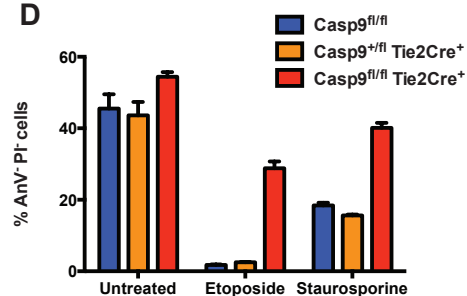

**E**

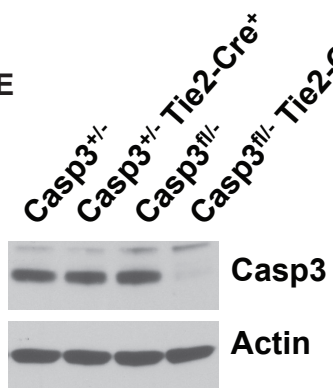

**F**

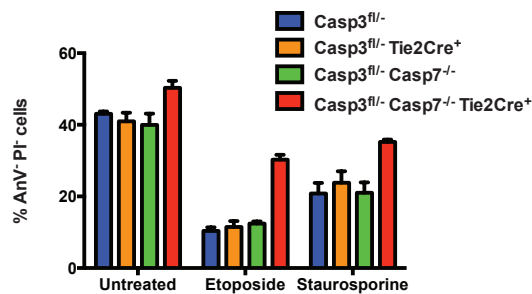

Supplement: NIHMS644595-supplement-1.pdf [file NIHMS644595-supplement-1.pdf]

## Supplementary figure 2

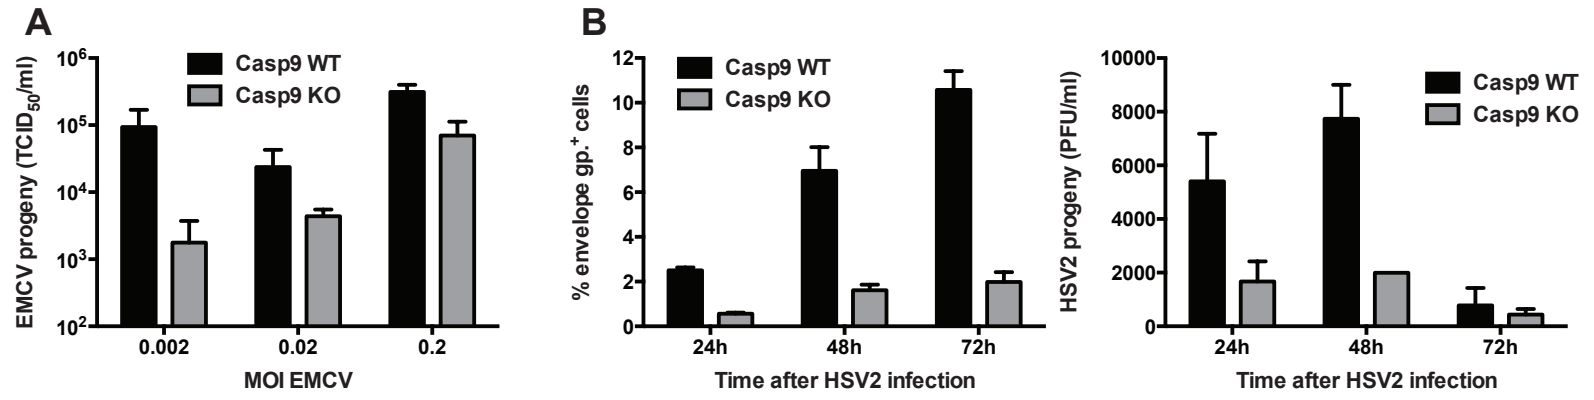

Supplement: NIHMS644595-supplement-2.pdf [file NIHMS644595-supplement-2.pdf]

# Supplementary figure 3

## A

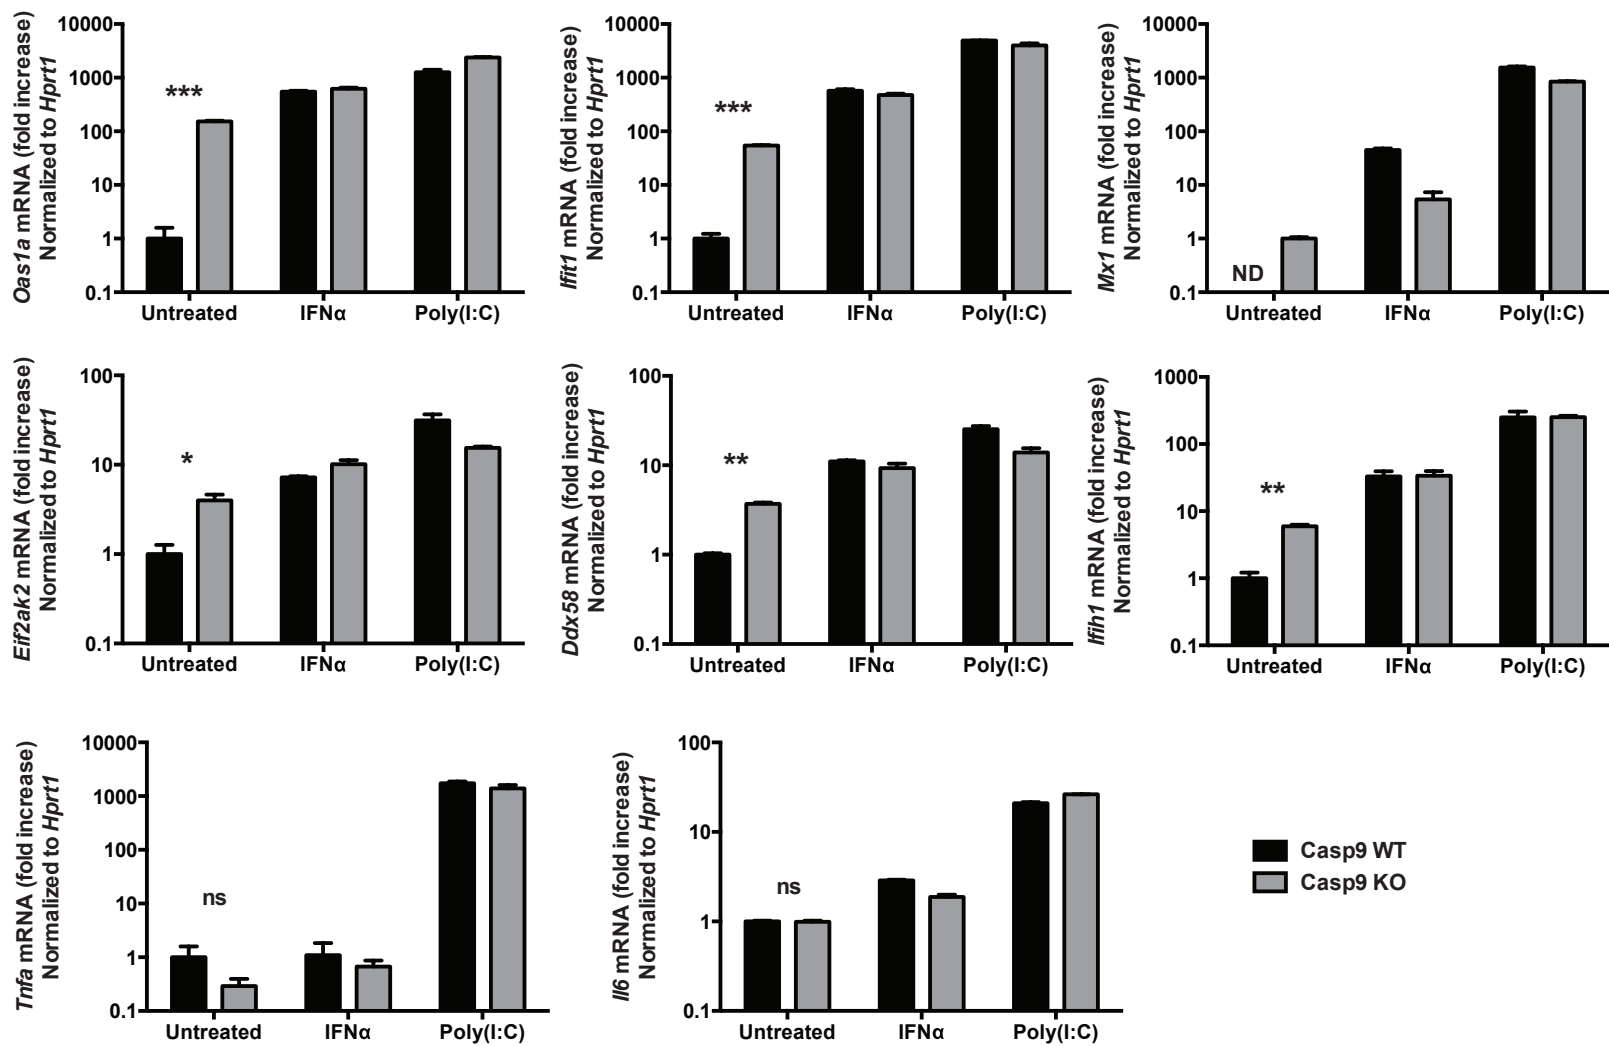

## B

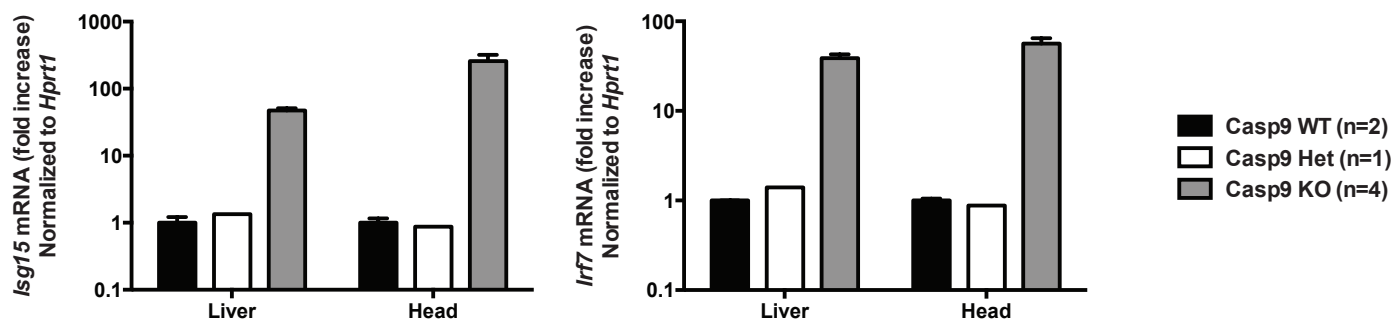

## C

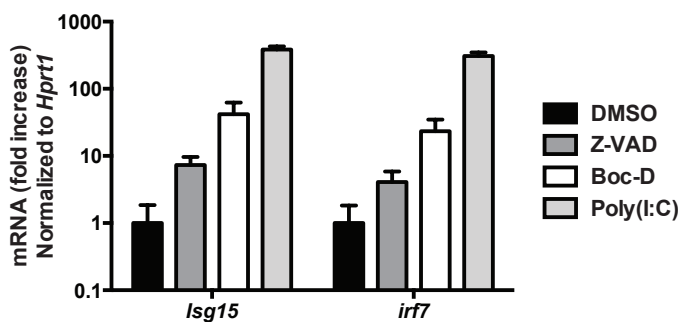

## D

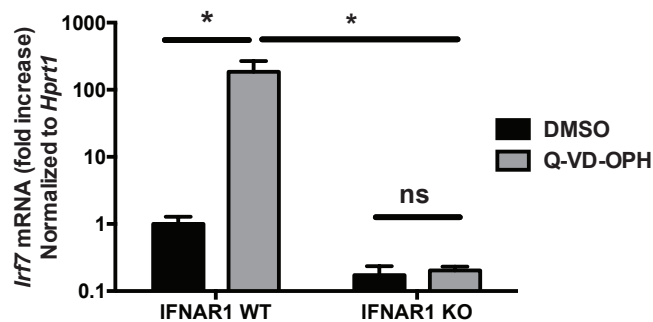

Supplement: NIHMS644595-supplement-3.pdf [file NIHMS644595-supplement-3.pdf]

## Supplementary figure 4

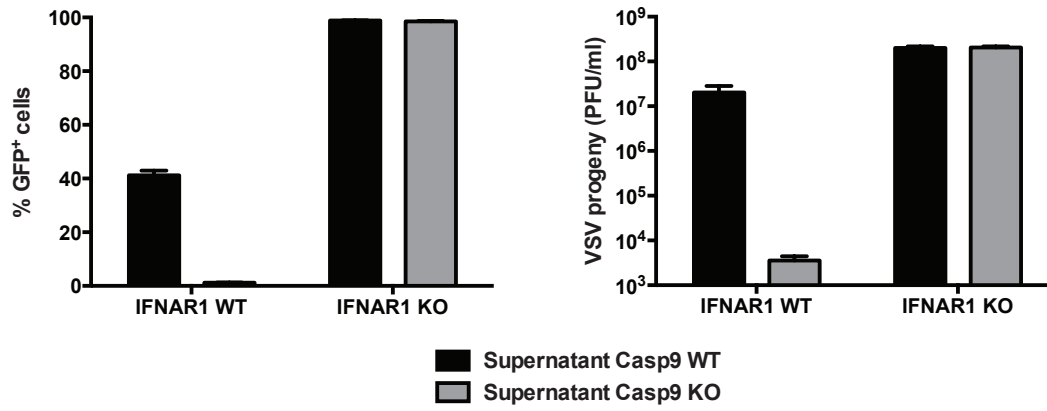

Supplement: NIHMS644595-supplement-4.pdf [file NIHMS644595-supplement-4.pdf]

# Supplementary figure 6

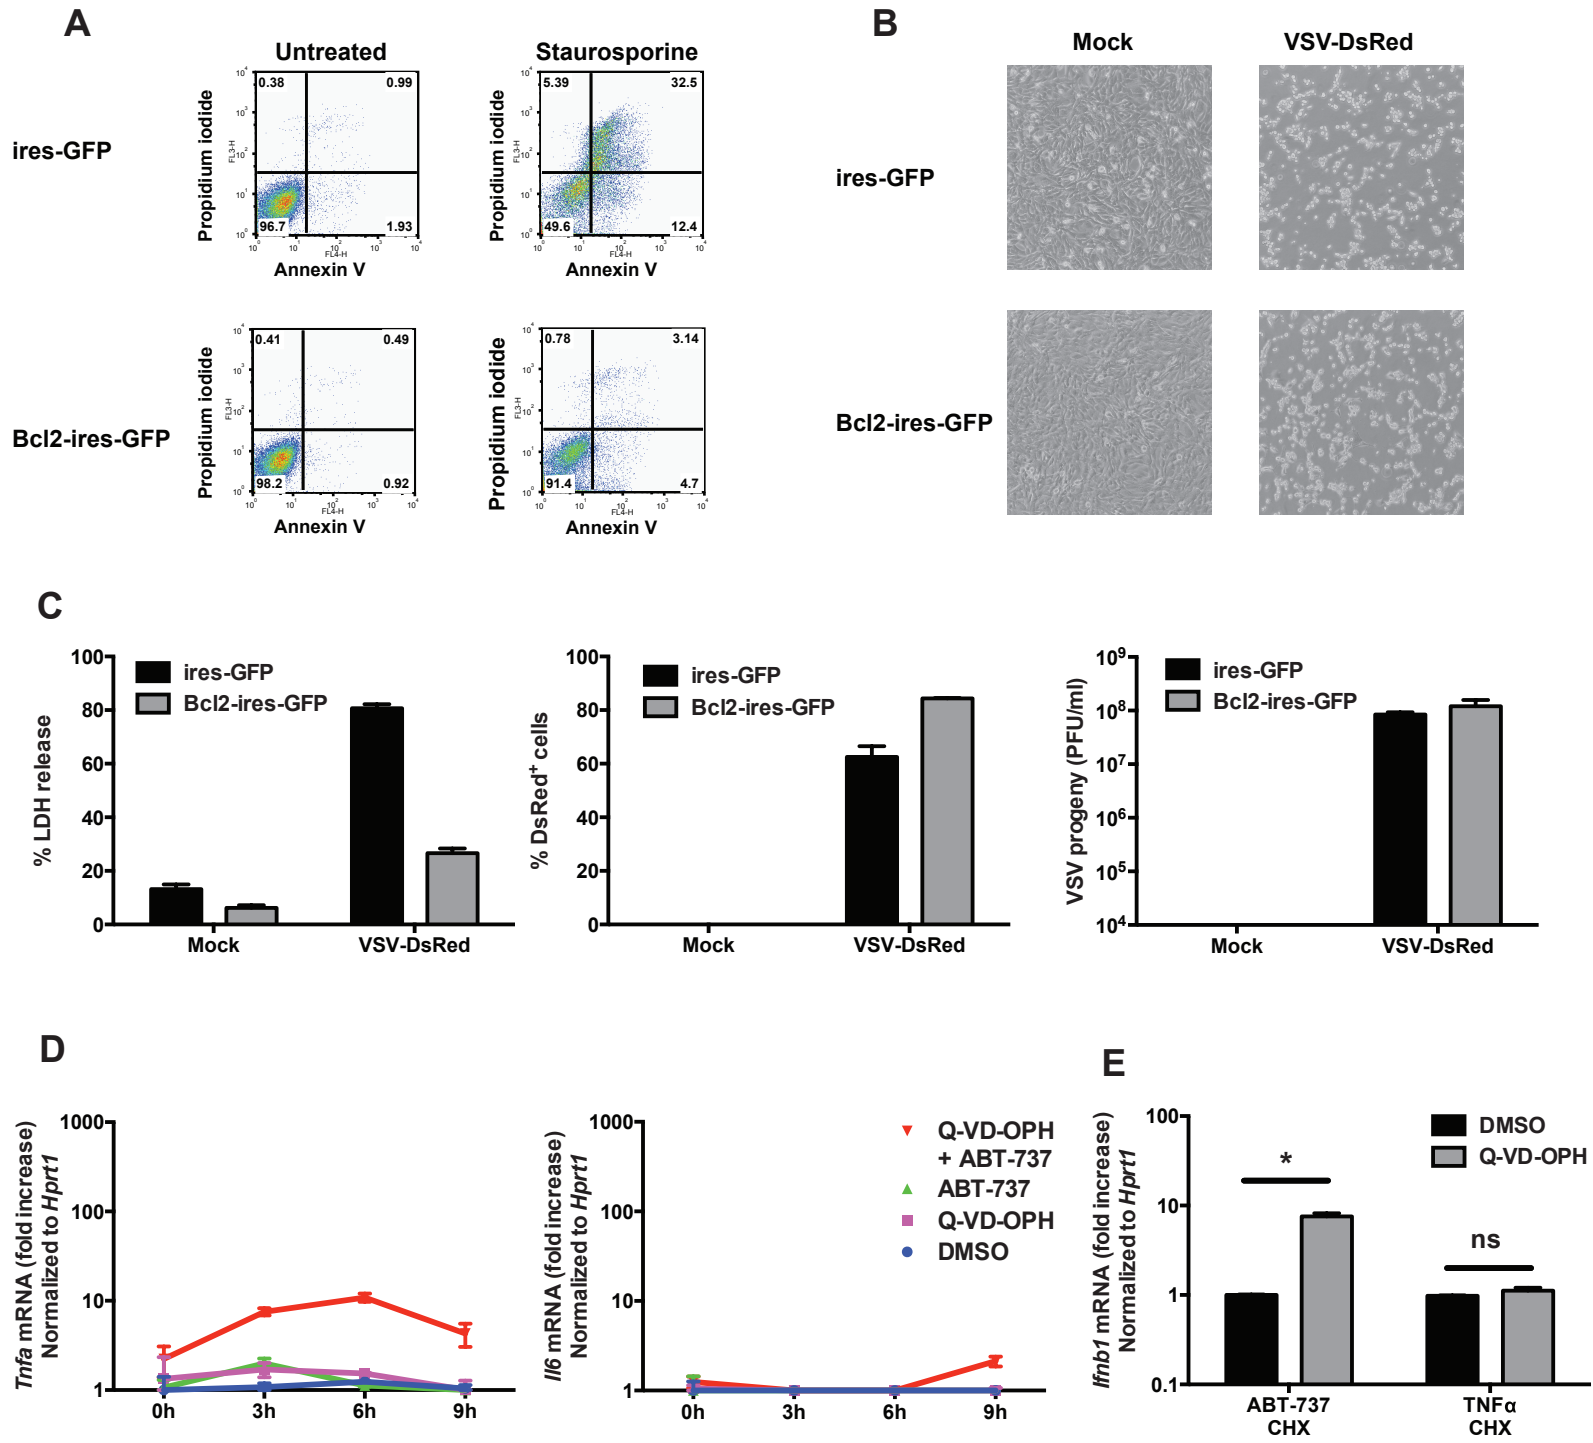

Supplement: NIHMS644595-supplement-6.pdf [file NIHMS644595-supplement-6.pdf]

# Supplementary figure 7

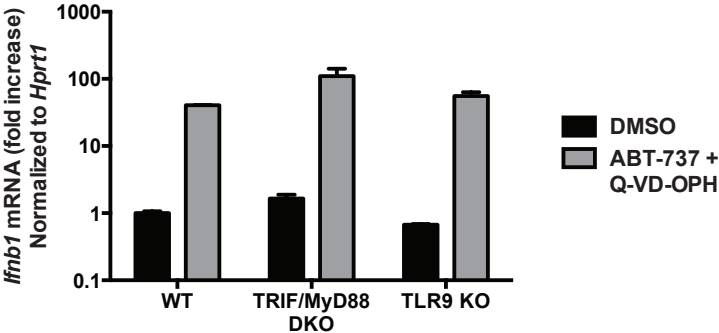

Supplement: NIHMS644595-supplement-7.pdf [file NIHMS644595-supplement-7.pdf]
